# Supplementary material for: The evaluation of immunotherapy and chemotherapy treatment on melanoma: a network meta-analysis
Source: PubMed Central journal article supplement (PMC5348408; doi:10.18632/oncotarget.13277), 2016-11-10
Supplement: oncotarget-07-81493-s001.pdf [file oncotarget-07-81493-s001.pdf]

# The evaluation of immunotherapy and chemotherapy treatment on melanoma: a network meta-analysis

## Supplementary Materials

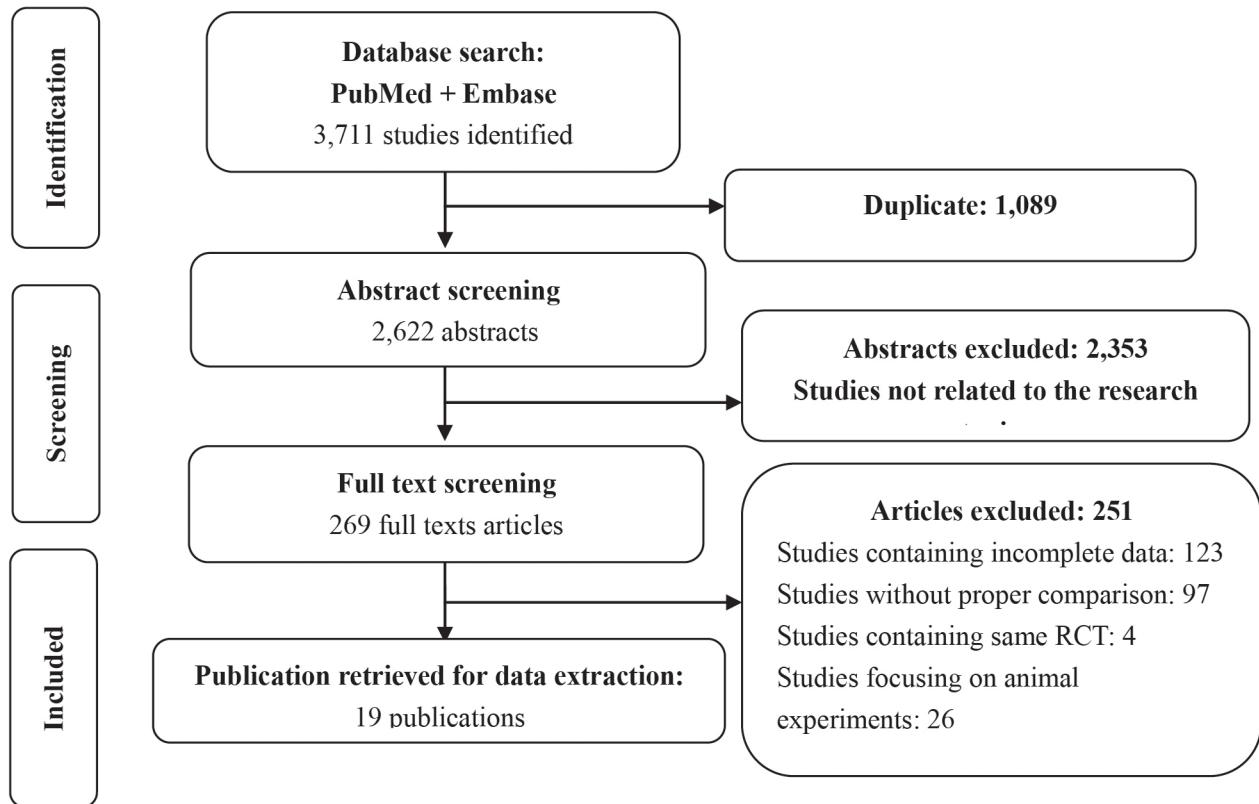

Supplementary Figure S1: Flow chart depicting the selection process.
